# Supplementary material for: Dermcidin exerts its oncogenic effects in breast cancer via modulation of ERBB signaling
Source: Springer Nature journal article supplement (doi:10.1186/s12885-015-1022-6), 2015-02-18
Supplement: MOESM1 [file 9743836]

**Table S1. ER/PR/ERBBs/DCD status, source, clinical and pathological features of the breast cancer cell lines**

| Cell Lines   | ER  | PR  | DCD </>4 | HER2 </>8 | HER3 </>9 | HER4 </>4 | EGFR </>7 | Source | Tumor Type | Subtype |
|--------------|-----|-----|----------|-----------|-----------|-----------|-----------|--------|------------|---------|
| EFM-192A     | pos |     | <        | >,A       | >         | <         | <         | PE     | IDC        | Lu      |
| EVSA-T       | neg | pos | >        | >         | >         | >         | <         | PE     | IDC        | Lu      |
| MDA-MB4-53   | neg | neg | >        | >,A       | >         | >         | >         | PF     | AC         | Lu      |
| MDA-MB-231   | neg | neg | >        | <         | <         | >         | >         | PE     | AC         | B       |
| BT-549       | neg | neg | >        | >         | <         | <         | >         | P.Br   | IDC        | B       |
| CAL85-1      | neg | neg | >        | >         | >         | <         | >         | PE     | IDC        | B       |
| EFM-19       | pos | pos | >        | >         | >         | <         | <         | PE     | Duc.Ca     | Lu      |
| BT-474       | pos | pos | <        | >,A       | >         | >         | <         | P.Br   | IDC        | Lu      |
| Hs.606T      |     |     | <        | <         | <         | <         | <         |        | N          |         |
| MDA-MB-415   | pos | neg | >        | <         | >         | >         | >         | PE     | AC         | Lu      |
| AU565        | neg | neg | >        | >,A       | >         | >         | >         | PE     | AC         | Lu      |
| Hs.578T      | neg | neg | >        | <         | <         | >         | >         | P.Br   | AC         | B       |
| BT-20        | neg | neg | >        | >         | >         | <         | >         | P.Br   | IDC        | B       |
| MDA-MB-361   | pos | neg | <        | >,A       | <         | <         | >         | P.Br   | AC         | Lu      |
| MDA-MB-436   | neg | neg | <        | <         | <         | <         | <         | PE     | IDC        | B       |
| SK-BR-3      | neg | neg | >        | >,A       | >         | <         | >         | PE     | AC         | Lu      |
| HCC1143      | neg | neg | <        | <         | <         | >         | >         | P.Br   | IDC        | B       |
| HCC1937      | neg | neg | <        | <         | <         | <         | >         | P.Br   | Duc.Ca     | B       |
| HCC1569      | neg | neg | >        | >,A       | >         | >         | <         | P.Br   | MBC        | B       |
| HCC1395      | neg | neg | <        | <         | <         | >         | <         | P.Br   | Duc.Ca     | B       |
| HCC2218      | neg | neg | >        | >,A       | >         | <         | <         | PE     | IDC        | Lu      |
| HCC1954      | neg | neg | <        | >,A       | <         | >         | <         | P.Br   | Duc.Ca     | B       |
| CAMA-1       | pos | neg | >        | >         | >         | >         | <         | PE     | AC         | Lu      |
| HMC-1-8      |     |     | <        | <         | <         | >         | <         | PE     | IDC        |         |
| HCC2157      | neg | neg | >        | >         | >         | >         | <         | P.Br   | Duc.Ca     | B       |
| Hs.739T      |     |     | <        | <         | <         | <         | <         | P.Br   | AC         |         |
| HCC38        | neg | neg | >        | >         | >         | <         | <         | P.Br   | Duc.Ca     | Lu      |
| DU-4475      | neg | neg | >        | <         | <         | <         | <         | P.Br   | Duc.Ca     | B       |
| MDA-MB-175VI | pos | neg | >        | >,A       | >         | <         | <         | PE     | IDC        | Lu      |
| YMB-1        | pos | neg | >        | >         | >         | >         | <         | AF     | IDC        |         |

|              |     |     |   |     |   |   |   |      |        |    |
|--------------|-----|-----|---|-----|---|---|---|------|--------|----|
| T47-D        | pos | pos | > | >   | > | > | < | PE   | IDC    | Lu |
| ZR-75-1      | pos | neg | > | >   | > | < | < | AF   | IDC    | Lu |
| HCC70        | neg | neg | < | >   | > | > | < | P.Br | Duc.Ca | B  |
| MCF-7        | pos | pos | > | >   | > | > | < | PE   | IDC    | Lu |
| HCC202       | neg | neg | > | >,A | > | < | < | P.Br | Duc.Ca | Lu |
| MDA-MB-157   | neg | neg | < | <   | < | > | < | PE   | MC     | B  |
| HCC1419      | neg | neg | < | <   | > | > | < | PE   | AC     | Lu |
| BT-483       | pos | pos | > | >   | > | > | < | P.Br | IDC    | Lu |
| Hs.281.T     |     |     | > | <   | < | < | < | P.Br | AC     |    |
| HCC1428      | pos | pos | > | <   | > | > | < | PE   | AC     | Lu |
| ZR-75-30     | pos | neg | > | >,A | > | > | < | AF   | IDC    | Lu |
| Hs.343T      |     |     | > | <   | < | < | < | AC   | Duc.CA |    |
| CAL-51       | neg | neg | < | <   | < | > | < | PE   | AC     | B  |
| CAL-120      | neg | neg | > | <   | < | > | < | PE   | IDC    | B  |
| JIMT1        | neg | neg | > | >A  | > | < | > | PE   | IDC    | Lu |
| HCC1806      | neg | neg | > | <   | > | > | > | P.Br | ASC    | B  |
| UACC-812     | pos | neg | < | >,A | > | < | < | P.Br | IDC    | Lu |
| CAL-148      | neg | neg | > | >   | > | > | < | PE   | IDC    | Lu |
| MDA-MB-134VI | pos | neg | > | <   | > | > | > | PE   | IDC    | Lu |
| HCC1500      | pos | pos | < | <   | > | > | < | P.Br | Duc.Ca | B  |
| HCC1599      | neg | neg | > | <   | > | > | < | PE   | Duc.Ca | B  |
| UACC-893     | neg | neg | > | >,A | > | > | > | P.Br | Duc.Ca | Lu |
| HDQ-P1       | neg | neg | < | <   | > | < | < | PE   | IDC    | B  |
| Hs.742T      |     |     | > | <   | < | < | < | P.Br | AC     |    |
| KPL-1        | pos | neg | < | <   | > | > | < | PE   | Duc.Ca | Lu |

Other cell lines used in this study

|           |     |     |   |     |   |   |   |      |          |   |
|-----------|-----|-----|---|-----|---|---|---|------|----------|---|
| 21MT1     | neg | pos | < | >,A |   |   |   | PE   | Lung Met |   |
| 21MT2     | neg | pos | < | >,A |   |   |   | PE   | Lung Met |   |
| 21NT      | neg | pos | > | >,A |   |   |   | P.Br | Duc.Ca   |   |
| 21PT      | neg | pos | < | >,A |   |   |   | P.Br | Duc.Ca   |   |
| HME50     | neg | neg | < | <   |   |   |   | P.Br | N        | B |
| MCF-10A   | neg | neg | < | <   |   |   |   | P.Br | N        | B |
| SUM-102PT | neg | neg | < | <   | < | < | < | P.Br | AC       | B |
| SUM-1315  | neg | neg | < | <   |   |   | > | P.Br | Duc.Ca   | B |

|            |     |     |   |     |   |   |     |    |            |    |
|------------|-----|-----|---|-----|---|---|-----|----|------------|----|
| SUM-149PT  | neg | neg | < | <   | < | < | >   | PE | Inf.Duc.Ca | B  |
| SUM-159PT  | neg | neg | < | <   |   |   | >   | PE | Ana.Ca     | B  |
| SUM-185PE  | neg | neg | > | <   | < |   |     | PE | Ana.Ca     | Lu |
| SUM-190PT  | neg | neg | > | >,A | > | < | >,A | PE | Inf.Duc.Ca | Lu |
| SUM-225CWN | neg | neg | < | >,A | > | < | >   | PE | Inf.Duc.Ca | B  |
| SUM-229PE  | neg | neg | < | <   |   |   | >   | PE | IDC        | B  |
| SUM-44     | pos | neg | > | <   |   |   | >,A | PE | Ca         | Lu |
| SUM-52     | pos | neg | > | <   |   |   | >,A | PE | Ca         | Lu |

The ER/PR/HER2 status and subtypes were obtained from Neve RM et al. 2006 (35), ATCC (<http://www.atcc.org>) and Asterand (<http://www.asterand.com>). The gene expression (GE) profile in 55 breast cancer cell lines used in this study is available at the Cancer Cell Line Encyclopedia (<http://www.broadinstitute.org/ccle>). The Affymetrix probes 117159\_at, 2064\_at and 2065\_at, 2066\_at and 1956\_at were chosen to obtain mRNA expression for DCD, HER2, HER3, HER4 and EGFR, respectively. The median of RMA (robust multiarray average) normalized expression value, log<sub>2</sub>, for each gene (DCD=4; HER2=8; HER3=9; HER4=4 and EGFR=7, respectively) was used to classify subgroups of cell line as lower (indicated as <) or higher expression (indicated as ≥) based on whether the value was below or equal or above the median for each gene across the 55 breast cancer cell lines. The relative level of DCD mRNA was confirmed in the majority of cell line using PCR assays as reported here (Figure 1) and elsewhere (Porter et al., 2003). Previous studies have analyzed the ER, PR and HER2 mRNA expression and confirmed the levels of expression correlates with those obtained using IHC and FISH assays (Neve RM et al. 2006).

**Abbreviations:** ER, estrogen receptor; PR, progesterone receptor; pos, positive; neg, negative; P.Br, primary breast; PE, pleural effusion; AF, ascites fluid; AC, adenocarcinoma; DuCa, ductal carcinoma; IDC, invasive ductal carcinoma; F, fibrocystic disease; Inf.BrCa, inflammatory carcinoma; Ana.Ca, anaplastic carcinoma; LungMeta, lung metastasis; MC, metaplastic carcinoma; ASC, acantholytic squamous carcinoma; Ca, carcinoma; B, basal; Lu; luminal; W, white; B, black; EL, East Indian; >,A, higher-amplified; N, normal.

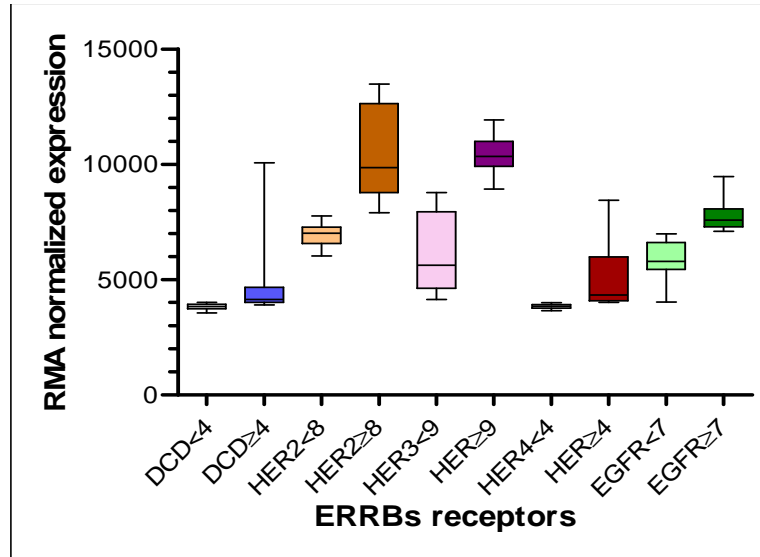

Figure S1. The average of RMA (robust multiarray average) normalized expression values for DCD, HER2, HER3, HER4 and EGFR in 55 breast cancer cell lines (Table S1). The subgroups of cell lines were classified as lower (indicated as <) or higher expression (indicated as >) based on whether the value was below or equal or above the median for each gene across the 55 breast cancer cell lines. The groups were compared by unpaired *t* test and the differences between groups were statistically significant ( $p < 0.005$ ).
