# Supplementary material for: Dermcidin exerts its oncogenic effects in breast cancer via modulation of ERBB signaling
Source: Springer Nature journal article supplement (doi:10.1186/s12885-015-1022-6), 2015-02-18
Supplement: MOESM2 [file 9743836]

|                 |                                                                                                                                                                                                                                                                                                                                                                                                                                                                                                                                                                                                                                                                                                                                                                                                                                                                                                                                                                                                                                                                                                                                             |
|-----------------|---------------------------------------------------------------------------------------------------------------------------------------------------------------------------------------------------------------------------------------------------------------------------------------------------------------------------------------------------------------------------------------------------------------------------------------------------------------------------------------------------------------------------------------------------------------------------------------------------------------------------------------------------------------------------------------------------------------------------------------------------------------------------------------------------------------------------------------------------------------------------------------------------------------------------------------------------------------------------------------------------------------------------------------------------------------------------------------------------------------------------------------------|
| Status          | Public on May 13, 2014                                                                                                                                                                                                                                                                                                                                                                                                                                                                                                                                                                                                                                                                                                                                                                                                                                                                                                                                                                                                                                                                                                                      |
| Title           | down-regulation of dermcidin by shRNA in breast cancer cell line MDA-MB-361                                                                                                                                                                                                                                                                                                                                                                                                                                                                                                                                                                                                                                                                                                                                                                                                                                                                                                                                                                                                                                                                 |
| Organism        | <a href="#">Homo sapiens</a>                                                                                                                                                                                                                                                                                                                                                                                                                                                                                                                                                                                                                                                                                                                                                                                                                                                                                                                                                                                                                                                                                                                |
| Experiment type | Expression profiling by array                                                                                                                                                                                                                                                                                                                                                                                                                                                                                                                                                                                                                                                                                                                                                                                                                                                                                                                                                                                                                                                                                                               |
| Summary         | <p>DCD is a gene amplified and overexpressed in a subset of breast tumors acting as a growth and survival factor. Patients with DCD-positive breast cancer have worse prognostic features. To investigate the role of DCD in breast tumorigenesis, we analyzed the consequences of its downregulation in human breast cancer cell lines using three specific shRNA lentivirus vectors. Genes up- and down-regulated by DCD were identified using Affymetrix microarray and analyzed by MetaCore Platform. We found that loss of DCD expression led to reduced cell proliferation, resistance to apoptosis, and suppressed tumorigenesis in immunodeficient mice. Network analysis of gene expression data revealed perturbed ERBB signaling following DCD shRNA expression including changes in the expression of ERBB receptors and their ligands. These findings imply that DCD promotes breast tumorigenesis via modulating the activity of the ERBB signaling pathways. As ERBB signaling is also important for neural survival, HER2+ breast tumors may hijack DCD's neural survival-promoting functions to promote tumorigenesis.</p> |
| Overall design  | MDA-MB-361 human breast cancer cell line expressing DCD-targeting shRNA in pLKO vector (clones 1, 2 and 3) and pLKO control vector                                                                                                                                                                                                                                                                                                                                                                                                                                                                                                                                                                                                                                                                                                                                                                                                                                                                                                                                                                                                          |
| Contributor(s)  | <a href="#">Markovic J</a> , <a href="#">Moreira DF</a> , <a href="#">Carrasco D</a> , <a href="#">Yao J</a> , <a href="#">Porter D</a> , <a href="#">Moura R</a> , <a href="#">Camargo A</a> , <a href="#">Fontes-Oliveira CC</a> , <a href="#">Malpartida MG</a> , <a href="#">Carambula S</a> , <a href="#">Vannier E</a> , <a href="#">Strauss BE</a> , <a href="#">Wakamatsu A</a> , <a href="#">Alves VA</a> , <a href="#">Logullo AF</a> , <a href="#">Soares FA</a> , <a href="#">Polyak K</a> , <a href="#">Belizario JE</a>                                                                                                                                                                                                                                                                                                                                                                                                                                                                                                                                                                                                       |
