# Supplementary material for: Dermcidin exerts its oncogenic effects in breast cancer via modulation of ERBB signaling
Source: Springer Nature journal article supplement (doi:10.1186/s12885-015-1022-6), 2015-02-18
Supplement: MOESM7 [file 9743836]

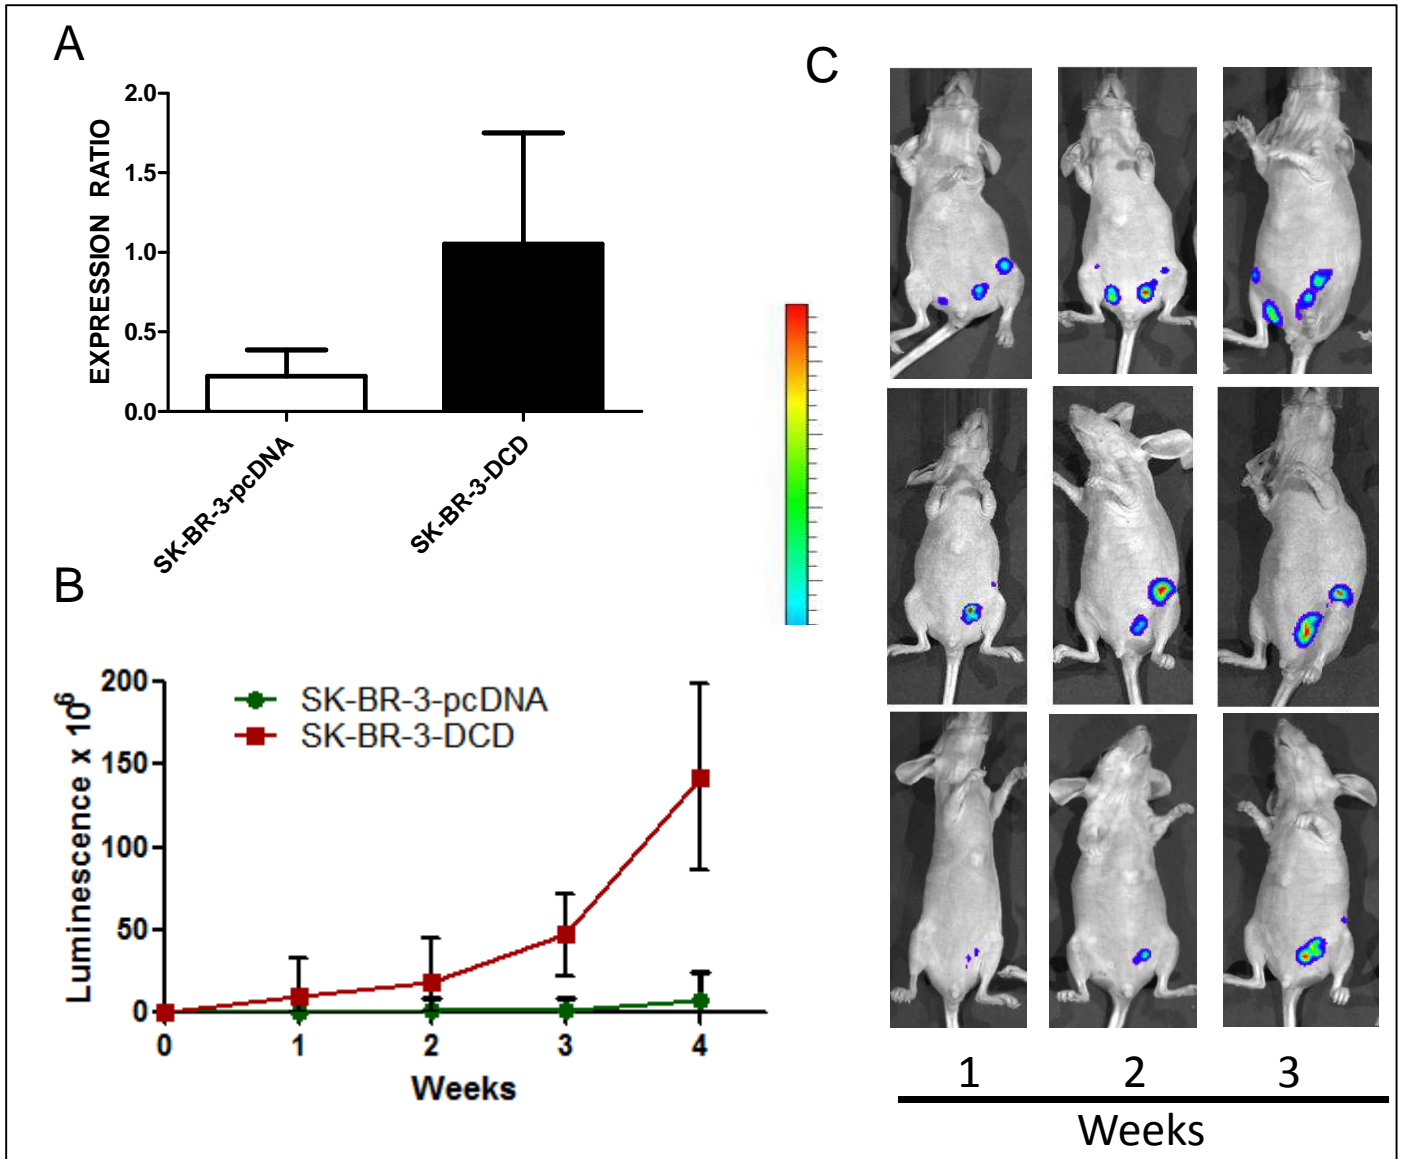

**Figure S6.** Characterization of SK-BR-3 cells stably expressing DCD and in vivo tumor growth in NUDE mice. Quantitative RT-PCR (**A**) confirming the expression of DCD mRNA. Y-axis indicates mean  $\pm$  SD mRNA levels (normalized to HPRT) relative to controls using REST software and the expression level in SK-BR-3 pcDNA control was designated as 1. **B**, Xenograft growth curves of control SK-BR-pcDNA and SK-BR-3 cells stably expressing DCD in the mammary fat pads of female NUDE mice. Results are given as means  $\pm$  SD of three experiments **C**, Bioluminescence IVIS images of mice carrying luciferase-expressing cells of three representative mice shows slow tumor growth in left side implanted with SK-BR-3-pcDNA as compared with right side implanted with SK-BR-DCD cells monitored weekly with IVIS Spectrum. These cell lines were created using a Luc2 vector for expressing luciferase which produce light when in presence of D-luciferin substrate. Color scale minimum  $10^3$  and maximum  $10^6$ .
